# Supplementary material for: Impact of Reduced-Dose Nonvitamin K Antagonist Oral Anticoagulants on Outcomes Compared to Warfarin in Korean Patients with Atrial Fibrillation: A Nationwide Population-Based Study
Source: MDPI journal article supplement (doi:10.3390/jcm10173918), 2021-08-30
Supplement: s1 [file s1]

**Table S1.** *International Classification of Disease, Tenth Revision (ICD-10) codes for the study outcomes.*

| Outcomes                    |                           | ICD-10 codes                                                                                                                                                                                                                                                             |
|-----------------------------|---------------------------|--------------------------------------------------------------------------------------------------------------------------------------------------------------------------------------------------------------------------------------------------------------------------|
| Stroke or systemic embolism | Ischemic stroke*          | G45.9, I63, and I69.3                                                                                                                                                                                                                                                    |
|                             | Haemorrhagic stroke*      | I60, I61, I62, I69.0, I69.1, and I69.2                                                                                                                                                                                                                                   |
|                             | Systemic embolism**       | I74                                                                                                                                                                                                                                                                      |
| Major bleeding***           | Intracranial hemorrhage*  | I60, I61, I62, I69.0, I69.1, I69.2, S06.4, S06.5, S06.6, and S06.8                                                                                                                                                                                                       |
|                             | Gastrointestinal bleeding | I85.0, I98.3, K22.11, K22.6, K22.8, K25.0, K25.2, K25.4, K25.6, K26.0, K26.2, K26.4, K26.6, K27.0, K27.2, K27.4, K27.6, K28.0, K28.2, K28.4, K28.6, K29.0, K31.81, K55.21, K62.5, K92.0, K92.1, and K92.2                                                                |
|                             | Bleeding from other sites | D62, H44.8, H35.72, H35.6, H31.3, H21.0, H11.3, H05.2, H47.0, H43.1, I31.2, N02.0–N02.9, N42.1, N83.1, N85.7, N92.0, N92.3, N93.0, N93.8, N93.9, M25.0, R23.3, R04.0, R04.1, R04.2, R04.8, R04.9, T79.2, T81.0, N95.0, R31.0, R31.1, R31.8, R58, T45.5, Y44.2, and D68.3 |

\* Brain CT/MRI procedure codes and hospitalization were also required to define ischemic stroke, hemorrhagic stroke or intracranial hemorrhage

\*\* Any CT/MRI procedure codes and hospitalization were also required to define systemic embolism

\*\*\* Hospitalization was also required to define major bleeding (i.e., intracranial hemorrhage, gastrointestinal bleeding and bleeding from other sites)

**Table S2.** Scoring and *International Classification of Disease, Tenth Revision* (ICD-10) codes for the factors included in the CHA<sub>2</sub>DS<sub>2</sub>-VASc score.

| Condition                | ICD-10 codes            | Point |
|--------------------------|-------------------------|-------|
| Congestive heart failure | I50                     | 1     |
| Hypertension             | I10-I15                 | 1     |
| Age                      | ≥75 years               | 2     |
| Diabetes                 | E10–E14                 | 1     |
| Stroke                   | I63, I69.3, and G45.9   | 2     |
| Vascular disease         | I21, I25.2, and I70–I73 | 1     |
| Age                      | 65–74 years             | 1     |
| Sex                      | Female                  | 1     |

**Table S3.** Scoring and *International Classification of Disease, Tenth Revision* (ICD-10) codes for the factors include in the HAS-BLED score.

| Condition                           | ICD-10 codes                                                                                                                                                                                                                                                                                                                                                                                                                                                                                                                                    | Point |
|-------------------------------------|-------------------------------------------------------------------------------------------------------------------------------------------------------------------------------------------------------------------------------------------------------------------------------------------------------------------------------------------------------------------------------------------------------------------------------------------------------------------------------------------------------------------------------------------------|-------|
| Hypertension                        | I10–I15                                                                                                                                                                                                                                                                                                                                                                                                                                                                                                                                         | 1     |
| Abnormal renal disease              | N18.3 and N18.4                                                                                                                                                                                                                                                                                                                                                                                                                                                                                                                                 | 1     |
| Abnormal liver function             | B15–B19, C22, D68.4, I98.2, I98.3, K70–K77, and Z94.4                                                                                                                                                                                                                                                                                                                                                                                                                                                                                           | 1     |
| Stroke                              | I63, I69.3, and G45.9                                                                                                                                                                                                                                                                                                                                                                                                                                                                                                                           | 1     |
| Bleeding history or predisposition* | I60, I61, I62, I69.0, I69.1, I69.2, S06.4, S06.5, S06.6, S06.8, I85.0, I98.3, K22.11, K22.6, K22.8, K25.0, K25.2, K25.4, K25.6, K26.0, K26.2, K26.4, K26.6, K27.0, K27.2, K27.4, K27.6, K28.0, K28.2, K28.4, K28.6, K29.0, K31.81, K55.21, K62.5, K92.0, K92.1, K92.2, D62, H44.8, H35.72, H35.6, H31.3, H21.0, H11.3, H05.2, H47.0, H43.1, I31.2, N02.0–N02.9, N42.1, N83.1, N85.7, N92.0, N92.3, N93.0, N93.8, N93.9, M25.0, R23.3, R04.0, R04.1, R04.2, R04.8, R04.9, T79.2, T81.0, N95.0, R31.0, R31.1, R31.8, R58, T45.5, Y44.2, and D68.3 | 1     |
| Elderly                             | ≥65 years                                                                                                                                                                                                                                                                                                                                                                                                                                                                                                                                       | 1     |
| Drug therapy                        | Antiplatelets and NSAIDs                                                                                                                                                                                                                                                                                                                                                                                                                                                                                                                        | 1     |
| Alcoholism                          | E24.4, F10, G31.2, G62.1, G72.1, I42.6, K29.2, K70, K86.0, O35.4, P04.3, Q86.0, T51.0, X45, X65, Y15, Y90–Y91, Z50.2, Z71.4, and Z72.1                                                                                                                                                                                                                                                                                                                                                                                                          | 1     |

\* A blood transfusion was also required to define a history of bleeding from other sites

**Table S4.** Types of baseline medications.

| <b>Class</b>                         | <b>Drugs</b>                                                                                                                                                                                                                       |
|--------------------------------------|------------------------------------------------------------------------------------------------------------------------------------------------------------------------------------------------------------------------------------|
| NSAIDs                               | Bromfenac, celecoxib, diclofenac, etodolac, fenoprofen, flurbiprofen, ibuprofen, indomethacin, ketoprofen, ketorolac, naproxen, meclofenamate, mefenamic acid, meloxicam, nabumetone, oxaprozin, piroxicam, sulindac, and tolmetin |
| Antiplatelets                        | Aspirin, clopidogrel, prasugrel, ticlopidine, cilostazol, abciximab, tirofiban, dipyridamole, and ticagrelor                                                                                                                       |
| Proton pump inhibitors               | Omeprazole, pantoprazole, lansoprazole, rabeprazole, esomeprazole, and dexlansoprazole                                                                                                                                             |
| H <sub>2</sub> -receptor antagonists | Cimetidine, ranitidine, famotidine, nizatidine, roxatidine, and lafutidine                                                                                                                                                         |
| Antiarrhythmics                      | Quinidine, procainamide, mexiletine, propafenone, flecainide, amiodarone, bretylium, dronedarone, propranolol, atenolol, esmolol, verapamil, diltiazem, and sotalol                                                                |
| Digoxin                              | Digoxin                                                                                                                                                                                                                            |
| Statins                              | Atorvastatin, fluvastatin, lovastatin, pitavastatin, pravastatin, rosuvastatin, and simvastatin                                                                                                                                    |

---

NSAID, nonsteroidal antiinflammatory drug

**Table S5.** Scoring and *International Classification of Disease, Tenth Revision* (ICD-10) codes for the factors included in the Charlson Comorbidity Index.

| Condition                                       | ICD-10 codes                                                                                                                                                                      | Point |
|-------------------------------------------------|-----------------------------------------------------------------------------------------------------------------------------------------------------------------------------------|-------|
| Cerebrovascular disease                         | G45.x, G46.x, H34.0, and I60.x–I69.x                                                                                                                                              | 1     |
| Congestive heart failure                        | I09.9, I11.0, I13.0, I13.2, I25.5, I42.0, I42.5–I42.9, I43.x, I50.x, and P29.0                                                                                                    | 1     |
| Chronic pulmonary disease                       | I27.8, I27.9, J40.x–J47.x, J60.x–J67.x, J68.4, J70.1, and J70.3                                                                                                                   | 1     |
| Dementia                                        | F00.x–F03.x, F05.1, G30.x, and G31.1                                                                                                                                              | 1     |
| Diabetes without chronic complication           | E10.0, E10.1, E10.6, E10.8, E10.9, E11.0, E11.1, E11.6, E11.8, E11.9, E12.0, E12.1, E12.6, E12.8, E12.9, E13.0, E13.1, E13.6, E13.8, E13.9, E14.0, E14.1, E14.6, E14.8, and E14.9 | 1     |
| Mild liver disease                              | B18.x, K70.0–K70.3, K70.9, K71.3–K71.5, K71.7, K73.x, K74.x, K76.0, K76.2–K76.4, K76.8, K76.9, and Z94.4                                                                          | 1     |
| Myocardial infarction                           | I21.x, I22.x, and I25.2                                                                                                                                                           | 1     |
| Peripheral vascular disease                     | I70.x, I71.x, I73.1, I73.8, I73.9, I77.1, I79.0, I79.2, K55.1, K55.8, K55.9, Z95.8, and Z95.9                                                                                     | 1     |
| Peptic ulcer disease                            | K25.x–K28.x,                                                                                                                                                                      | 1     |
| Rheumatologic disease                           | M05.x, M06.x, M32.x–M34.x M31.5M35.1, M35.3, and M36.0                                                                                                                            | 1     |
| Diabetes with chronic complication              | E10.2–E10.5, E10.7, E11.2–E11.5, E11.7, E12.2–E12.5, E12.7, E13.2–E13.5, E13.7, E14.2–E14.5, and E14.7                                                                            | 2     |
| Hemiplegia or paraplegia                        | G04.1, G11.4, G80.1, G80.2, G81.x, G82.x, G83.0–G83.4, and G83.9                                                                                                                  | 2     |
| Any malignancy, including leukemia and lymphoma | C00.x–C26.x, C30.x–C34.x, C37.x–C41.x, C43.x, C45.x–C58.x, C60.x–C76.x, C81.x–C85.x, C88.x, and C90.x–C97.x                                                                       | 2     |
| Renal disease                                   | I12.0, I13.1, N03.2–N03.7, N05.2–N05.7, N18.x, N19.x, N25.0, Z49.0–Z49.2, Z94.0, and Z99.2                                                                                        | 2     |
| Moderate or severe liver disease                | I85.0, I85.9, I86.4, I98.2, K70.4, K71.1, K72.1, K72.9, K76.5, K76.6, and K76.7                                                                                                   | 3     |
| AIDS/HIV                                        | B20.x–B22.x and B24.x                                                                                                                                                             | 6     |
| Metastatic solid tumor                          | C77.x–C80.x                                                                                                                                                                       | 6     |

**Table S6.** Baseline characteristics of patients receiving reduced-dose nonvitamin K antagonist oral anticoagulants and warfarin before propensity score matching.

|                                              | Propensity score matching |                      |                          |                      |                           |                      |
|----------------------------------------------|---------------------------|----------------------|--------------------------|----------------------|---------------------------|----------------------|
|                                              | Before                    |                      |                          |                      |                           |                      |
|                                              | R.Apixaban<br>(n=5249)    | Warfarin<br>(n=8648) | R.Dabigatran<br>(n=6033) | Warfarin<br>(n=8648) | R.Rivaroxaban<br>(n=7602) | Warfarin<br>(n=8648) |
| Age (years), mean                            | 76.02                     | 68.73                | 74.33                    | 68.73                | 75.25                     | 68.73                |
| Female, %                                    | 52.22                     | 37.44                | 46.91                    | 37.44                | 49.83                     | 37.44                |
| CHA <sub>2</sub> DS <sub>2</sub> -VASc, mean | 5.04                      | 4.06                 | 4.68                     | 4.06                 | 4.80                      | 4.06                 |
| HAS-BLED, mean                               | 3.74                      | 3.34                 | 3.59                     | 3.34                 | 3.62                      | 3.34                 |
| CCI, mean                                    | 4.53                      | 4.04                 | 4.01                     | 4.04                 | 4.18                      | 4.04                 |
|                                              | Insurance, %              |                      |                          |                      |                           |                      |
| National health insurance                    | 92.55                     | 92.45                | 91.63                    | 92.45                | 92.50                     | 92.45                |
| Medical aid                                  | 7.45                      | 7.55                 | 8.37                     | 7.55                 | 7.50                      | 7.55                 |
|                                              | Medical history, %        |                      |                          |                      |                           |                      |
| Heart failure                                | 46.47                     | 41.00                | 42.91                    | 41.00                | 46.70                     | 41.00                |
| Hypertension                                 | 88.59                     | 80.80                | 90.37                    | 80.80                | 91.12                     | 80.80                |
| Diabetes                                     | 57.13                     | 51.57                | 52.35                    | 51.57                | 54.74                     | 51.57                |
| Ischemic stroke                              | 37.59                     | 32.15                | 31.23                    | 32.15                | 29.43                     | 32.15                |
| Vascular disease                             | 31.22                     | 29.24                | 30.33                    | 29.24                | 30.72                     | 29.24                |
| Renal disease (CKD3/4)                       | 2.97                      | 2.45                 | 1.09                     | 2.45                 | 2.10                      | 2.45                 |
| Bleeding                                     | 14.00                     | 13.54                | 8.52                     | 13.54                | 10.16                     | 13.54                |
|                                              | Medication history, %     |                      |                          |                      |                           |                      |
| NSAIDs                                       | 81.01                     | 76.38                | 81.78                    | 76.38                | 81.62                     | 76.38                |
| Antiplatelets                                | 75.65                     | 70.06                | 75.80                    | 70.06                | 77.95                     | 70.06                |
| Antiarrhythmics                              | 49.55                     | 48.60                | 46.43                    | 48.60                | 42.98                     | 48.60                |
| Statins                                      | 60.35                     | 51.41                | 58.51                    | 51.41                | 55.29                     | 51.41                |
| PPI                                          | 46.52                     | 42.77                | 42.55                    | 42.77                | 42.36                     | 42.77                |
| H2RA                                         | 70.58                     | 66.27                | 68.41                    | 66.27                | 67.73                     | 66.27                |
| Digoxin                                      | 26.16                     | 27.56                | 26.65                    | 27.56                | 27.35                     | 27.56                |

CCI, Charlson Comorbidity Index; CHA<sub>2</sub>DS<sub>2</sub>-VASc, congestive heart failure, hypertension, age  $\geq$  75 years, diabetes mellitus, stroke, vascular disease, age 65–74 years, and sex; CKD, chronic kidney disease; HAS-BLED, hypertension, abnormal renal and liver function, stroke, bleeding, labile international normalized ratio, elderly, drugs or alcohol; H2RA, H<sub>2</sub>-receptor antagonists; PPI, proton pump inhibitors; R, reduced dose.
